# Supplementary material for: The Use of Long-Read Sequencing to Study the Phylogenetic Diversity of the Potato Varieties Plastome of the Ural Selection
Source: MDPI journal article supplement (doi:10.3390/agronomy12040846), 2022-03-30
Supplement: s1 [file s1]

| Variety   | Reads number | Total length | Min read length | Mean read length | Max read length | % of reads participating in the assembly of the plastom | Coverage |
|-----------|--------------|--------------|-----------------|------------------|-----------------|---------------------------------------------------------|----------|
| 12-22-134 | 18,388       | 202,618,009  | 5,000           | 11,019.0         | 50,000          | 16.7                                                    | 188.1    |
| 14-4-1    | 15,023       | 182,354,649  | 6,000           | 12,138.4         | 63,818          | 17.3                                                    | 177.6    |
| 14-6-3    | 17,703       | 226,960,808  | 6,000           | 12,820.5         | 59,141          | 20.1                                                    | 223.5    |
| 15-22-4   | 39,37        | 456,121,872  | 6,000           | 11,585.5         | 78,43           | 9.0                                                     | 225.3    |
| 15-27-1   | 19,674       | 231,981,845  | 6,000           | 11,791.3         | 70,020          | 10.4                                                    | 125.5    |
| 16-1-2    | 14,135       | 162,257,237  | 6,000           | 11,479.1         | 53,403          | 9.7                                                     | 96.4     |
| 16-4-3    | 17,064       | 200,411,004  | 6,000           | 11,744.7         | 72,118          | 13.7                                                    | 157.0    |
| 16-35-5   | 10,600       | 121,452,458  | 6,000           | 11,457.8         | 61,096          | 10.7                                                    | 78.4     |
| Alaska*   | 33,938       | 495,961,272  | 6,073           | 14,613.7         | 82,890          | 86.2                                                    | 2,583.6  |
| Amur      | 11,889       | 152,931,501  | 6,001           | 12,863.3         | 54,214          | 15.7                                                    | 138      |
| Argo*     | 51,708       | 698,952,197  | 6,000           | 13,517.3         | 66,362          | 86.4                                                    | 3,648.8  |
| Bagira    | 13,329       | 153,107,596  | 6,000           | 11,486.8         | 80,491          | 13.5                                                    | 120.5    |
| Bankir    | 12,544       | 150,064,855  | 6,000           | 11,963.1         | 55,963          | 15.6                                                    | 136.8    |
| Baron     | 19,191       | 221,274,095  | 6,000           | 11,530.1         | 62,333          | 14.4                                                    | 193.2    |
| Bravo     | 11,449       | 125,451,560  | 6,000           | 10,957.4         | 53,922          | 10.3                                                    | 76.5     |
| Gornyak   | 8,659        | 103,545,890  | 6,002           | 11,958.2         | 56,627          | 13.3                                                    | 78.6     |
| Irbitskiy | 12,442       | 154,961,274  | 6,000           | 12,454.7         | 52,290          | 14.8                                                    | 136.5    |
| Iskra     | 21,603       | 259,703,281  | 6,000           | 12,021.6         | 60,904          | 15.8                                                    | 236      |
| Kamenskiy | 45,675       | 455,124,157  | 5,000           | 9,964.4          | 63,213          | 14.4                                                    | 354.2    |
| Legenda*  | 27,166       | 324,604,429  | 6000            | 10,425.2         | 72,354          | 94.2                                                    | 1,972.7  |
| Luks      | 28,553       | 343,674,010  | 5,000           | 12,036.4         | 66,639          | 16                                                      | 295.5    |
| Mishka    | 23,000       | 265,499,292  | 6,000           | 11,543.4         | 52,333          | 18.4                                                    | 275.2    |

|                 |        |             |       |          |         |      |         |
|-----------------|--------|-------------|-------|----------|---------|------|---------|
| Otrada          | 9,253  | 99,146,651  | 5,000 | 10,715.1 | 105,317 | 8.8  | 50.2    |
| Shah*           | 42,672 | 606,574,939 | 6,889 | 14,214.8 | 96,525  | 92.8 | 3,544.8 |
| Start           | 11,015 | 136,505,068 | 6,000 | 12,392.7 | 69,710  | 17.1 | 134.5   |
| Terra           | 24,448 | 303,942,278 | 6,000 | 12,432.2 | 64,741  | 22.0 | 386.8   |
| Utro<br>ranneye | 15,394 | 172,784,486 | 6,000 | 11,224.1 | 77,501  | 14.0 | 144.2   |
| Zdraven         | 12,659 | 143,341,590 | 6,002 | 11,323.3 | 60,946  | 11.4 | 94.4    |

Sequencing and filtering results obtained using Oxford Nanopore Technologies whole genome sequencing of 28 potato varieties developed at Ural Research Institute of Agriculture. \* – marked samples sequenced individually, other samples were simultaneously sequenced in multiplex using a single flowcell.
